# Supplementary material
Source: Springer Nature journal article supplement (https://www.springermedizin.de/resource/supplementary/12885_2011_3026_MOESM1_ESM.pdf/9462444)

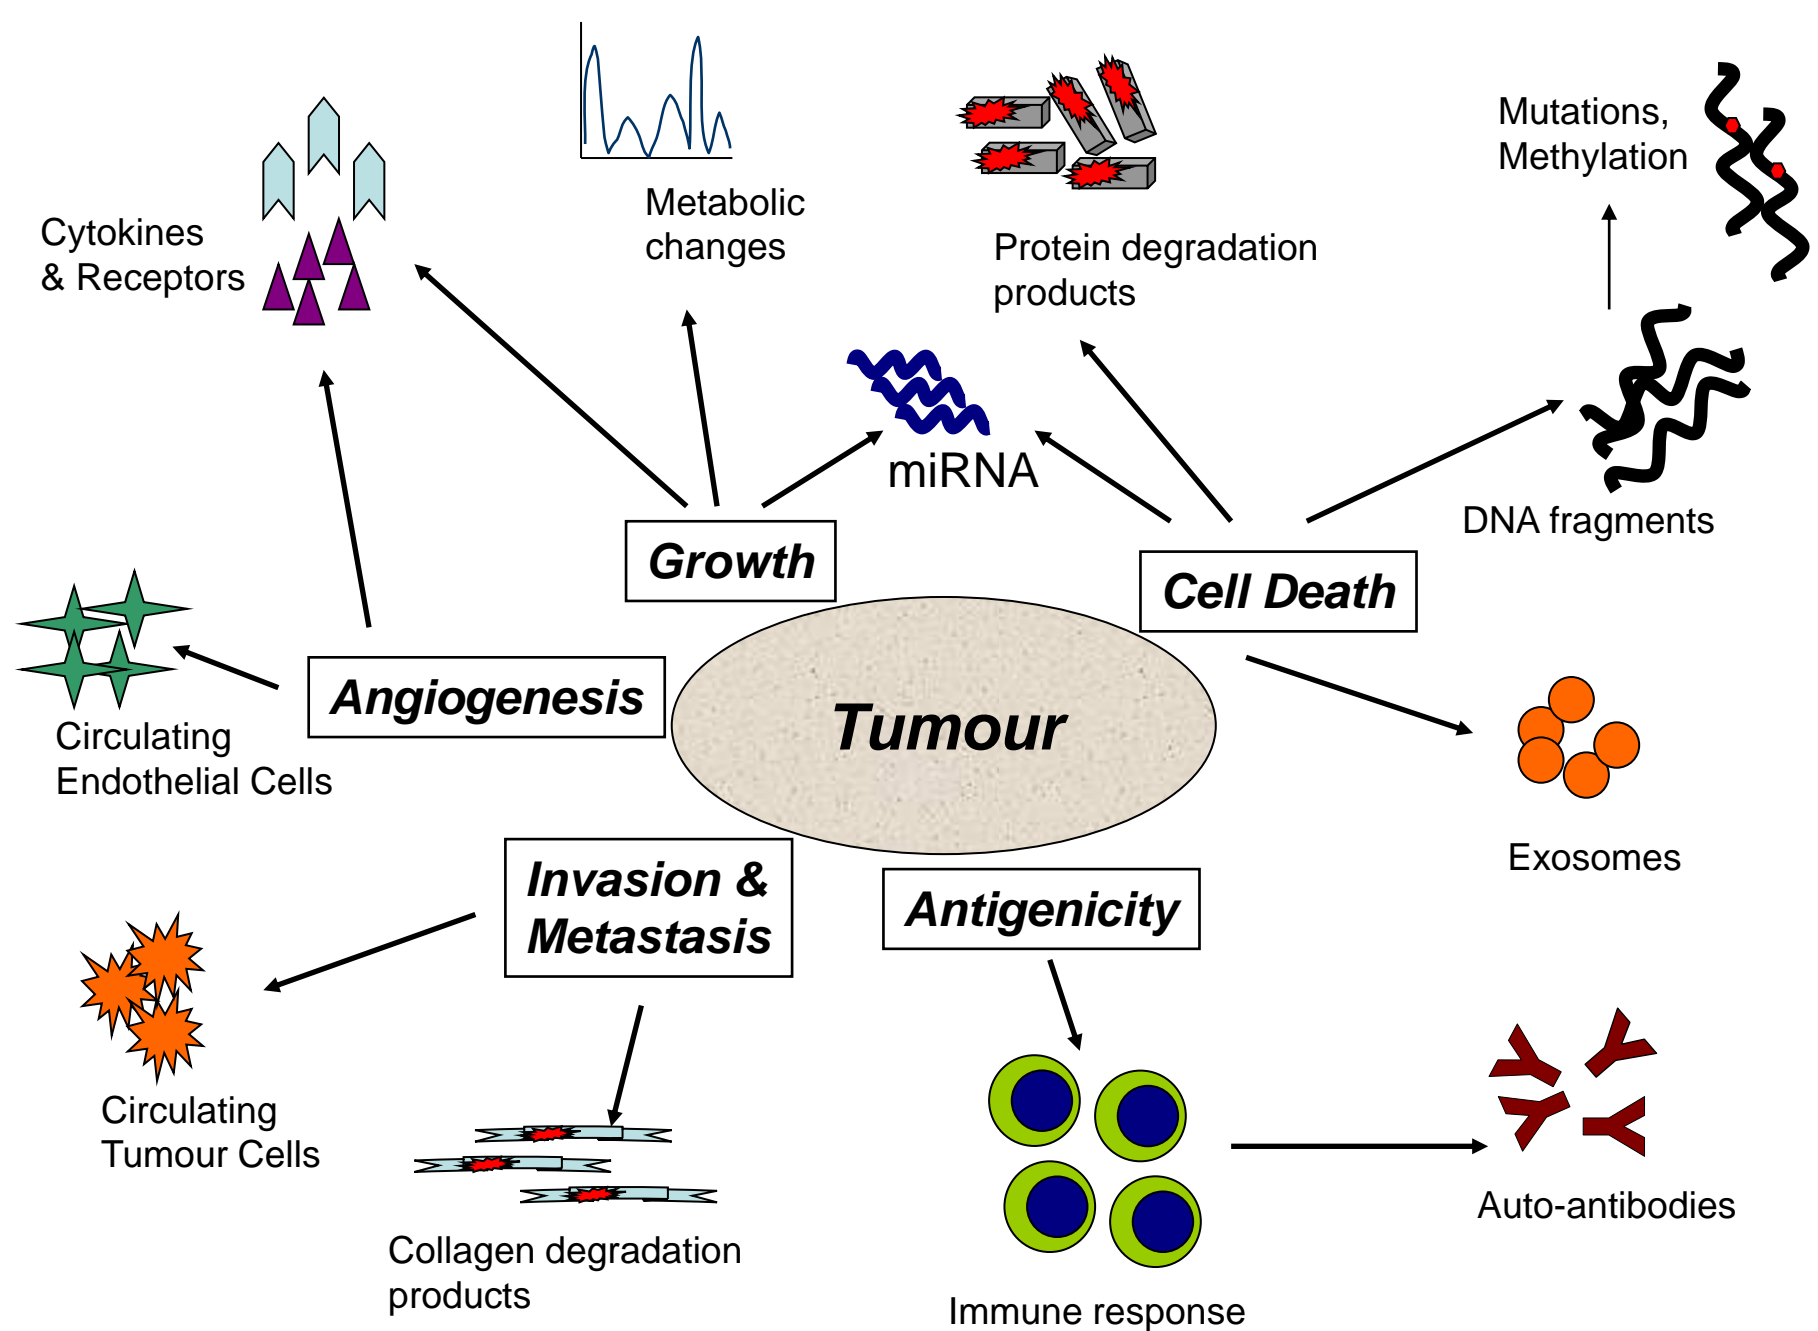

Supplement: MOESM1 [file 9462444]
